# Supplementary material
Source: HighWire-hosted journal article supplement (https://erj.ersjournals.com/content/58/2/2101578)

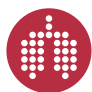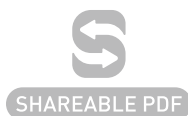

# Hyperventilation as one of the mechanisms of persistent dyspnoea in SARS-CoV-2 survivors

Justina Motiejunaite <sup>1,2</sup>, Pauline Balagny<sup>1,3</sup>, Florence Arnoult<sup>1</sup>, Laurence Mangin<sup>1,4</sup>, Catherine Bancal<sup>1</sup>, Emmanuelle Vidal-Petiot<sup>1,2,5</sup>, Martin Flamant<sup>1,2,5</sup>, Guillaume Jondeau<sup>2,6,7</sup>, Alain Cohen-Solal<sup>2,8,9</sup>, Marie-Pia d'Ortho<sup>1,2,10</sup> and Justine Fria-Masson <sup>1,2,10</sup>

<sup>1</sup>Service de Physiologie Clinique-Explorations Fonctionnelles, Assistance Publique Hôpitaux de Paris, Hôpital Bichat-Claude Bernard, Paris, France. <sup>2</sup>Université de Paris, Paris, France. <sup>3</sup>INSERM, Population-based Epidemiological Cohorts Unit, UMS 011, Paris, France. <sup>4</sup>Laboratoire Matière et Système Complexes UMR 7057, CNRS, Paris, France. <sup>5</sup>INSERM, U1149, Paris, France. <sup>6</sup>Service de Cardiologie, Assistance Publique Hôpitaux de Paris, Hôpital Bichat-Claude Bernard, Paris, France. <sup>7</sup>INSERM, U1148, Paris, France. <sup>8</sup>Service de Cardiologie, Assistance Publique Hôpitaux de Paris, Hôpital Lariboisière, Paris, France. <sup>9</sup>INSERM UMR-S 942, Paris, France. <sup>10</sup>INSERM, UMR 1141 NeuroDiderot, Paris, France.

Justina Motiejunaite ([justina.motiejunaite@aphp.fr](mailto:justina.motiejunaite@aphp.fr))

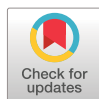

Shareable abstract (@ERSpublications)

**Inadequate exercise hyperventilation should not be overlooked while exploring the causes of exertional dyspnoea in SARS-CoV-2 survivors** <https://bit.ly/3AxOiDh>

**Cite this article as:** Motiejunaite J, Balagny P, Arnoult F, *et al.* Hyperventilation as one of the mechanisms of persistent dyspnoea in SARS-CoV-2 survivors. *Eur Respir J* 2021; 58: 2101578 [DOI: 10.1183/13993003.01578-2021].

This single-page version can be shared freely online.

Copyright ©The authors 2021.

This version is distributed under the terms of the Creative Commons Attribution Non-Commercial Licence 4.0. For commercial reproduction rights and permissions contact [permissions@ersnet.org](mailto:permissions@ersnet.org)

This article has an editorial commentary:  
<https://doi.org/10.1183/13993003.01763-2021>

Received: 4 June 2021  
Accepted: 28 June 2021

*To the Editor:*

There are increasing reports of persistent dyspnoea several months after the onset of severe acute respiratory syndrome coronavirus 2 (SARS-CoV-2) infection [1]. In most cases, functional disability seems out of proportion compared to residual pulmonary function impairment [2]. To date, knowledge about the functional limitations following a SARS-CoV-2 infection remains limited.

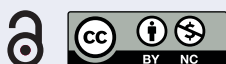

Supplement: inline-supplementary-material-1 [file inline-supplementary-material-1.pdf]
